# Supplementary material for: Frequency Dependent Topological Patterns of Resting-State Brain Networks
Source: PLoS One. 2015 Apr 30;10(4):e0124681. doi: 10.1371/journal.pone.0124681 (PMC4415801; doi:10.1371/journal.pone.0124681)
Supplement: S1 Table — The frequency-specific brain networks for each participants were constructed using an AAL template. The hub regions based on regional betweenness were identified if Bi(w,auc) was at least 1 SD greater than the mean Bi(w,auc) of the network. The hubs were then sorted by the corresponding AUC values in each IMF. The cortical regions were classified as primary, association, and paralimbic. (DOCX) [file pone.0124681.s006.docx]

## S1 Table. Betweenness-based hub regions with global signal regression.

S1.1 Table. Hub regions in IMF1 component.

| Regions | Class | Betweenness (AUC) |
| --- | --- | --- |
| SPG.L | Association (Heteromodal) | 86.4800 |
| IPL.L | Association (Heteromodal) | 82.1200 |
| PHG.R | Paralimbic | 72.2950 |
| TPOsup.R | Paralimbic | 67.5500 |
| ANG.L | Association (Heteromodal) | 64.1750 |
| REC.L | Paralimbic | 63.8800 |
| PoCG.R | Primary | 61.8400 |
| PCG.L | Paralimbic | 57.7250 |
| TPOsup.L | Paralimbic | 54.0900 |
| INS.R | Paralimbic | 51.1150 |
| SOG.L | Association | 41.9250 |

S1.2 Table. Hub regions in IMF2 component.

| Regions | Class | Betweenness (AUC) |
| --- | --- | --- |
| IPL.L | Association (Heteromodal) | 63.3500 |
| PHG.R | Paralimbic | 54.1100 |
| ORBsupmed.L | Paralimbic | 47.3900 |
| PoCG.R | Primary | 47.2150 |
| IPL.R | Association (Heteromodal) | 47.1850 |
| SMG.R | Association (Heteromodal) | 43.5050 |
| TPOsup.L | Paralimbic | 43.3350 |
| SPG.L | Association (Heteromodal) | 43.3100 |
| TPOsup.R | Paralimbic | 38.6900 |
| INS.R | Paralimbic | 37.7000 |
| ACG.L | Paralimbic | 35.7900 |
| ORBsupmed.R | Paralimbic | 33.5450 |
| SOG.R | Association | 32.8050 |
| ACG.R | Paralimbic | 32.2400 |
| PHG.L | Paralimbic | 31.5750 |

S1.3 Table. Hub regions in IMF3 component

| Regions | Class | Betweenness (AUC) |
| --- | --- | --- |
| PHG.R | Paralimbic | 71.8950 |
| PCG.L | Paralimbic | 39.4450 |
| PoCG.R | Primary | 38.5350 |
| IPL.L | Association (Heteromodal) | 38.1000 |
| FFG.R | Association (Unimodal) | 37.8800 |
| PHG.L | Paralimbic | 37.0400 |
| IPL.R | Association (Heteromodal) | 36.7350 |
| ORBsupmed.L | Paralimbic | 35.3450 |
| SPG.L | Association (Heteromodal) | 34.1250 |
| TPOsup.L | Paralimbic | 33.1550 |
| AMYG.R | Subcortical | 32.5800 |
| SMG.R | Association (Heteromodal) | 32.5550 |
| ORBsupmed.R | Paralimbic | 31.7200 |
| TPOsup.R | Paralimbic | 28.8200 |

S1.4 Table. Hub regions in IMF4 component

| Regions | Class | Betweenness (AUC) |
| --- | --- | --- |
| FFG.R | Association (Unimodal) | 54.6400 |
| PoCG.R | Primary | 46.8800 |
| PCG.L | Paralimbic | 42.2100 |
| PHG.R | Paralimbic | 41.0850 |
| TPOsup.L | Paralimbic | 39.2850 |
| ORBsupmed.L | Paralimbic | 37.6200 |
| IPL.R | Association (Heteromodal) | 30.4450 |
| SMG.R | Association (Heteromodal) | 29.8250 |
| AMYG.R | Subcortical | 29.7550 |
| TPOsup.R | Paralimbic | 28.0100 |
| SPG.R | Association (Heteromodal) | 26.1500 |
| ACG.L | Paralimbic | 25.7250 |
| IPL.L | Association (Heteromodal) | 24.3950 |

S1.5 Table. Hub regions in IMF5 component

| Regions | Class | Betweenness (AUC) |
| --- | --- | --- |
| PoCG.R | Primary | 42.2850 |
| ORBsupmed.L | Paralimbic | 35.1400 |
| FFG.R | Association (Unimodal) | 34.7650 |
| TPOsup.L | Paralimbic | 31.1800 |
| AMYG.R | Subcortical | 28.7600 |
| PCG.L | Paralimbic | 27.4650 |
| SFGmed.L | Association | 27.2250 |
| ACG.L | Paralimbic | 26.7250 |
| IPL.R | Association (Heteromodal) | 25.6800 |
| SMG.R | Association (Heteromodal) | 25.2900 |
| SPG.L | Association (Heteromodal) | 24.9400 |
| ORBsupmed.R | Paralimbic | 24.8250 |
| SOG.R | Association | 24.6100 |
| SPG.R | Association (Heteromodal) | 23.6700 |
| TPOsup.R | Paralimbic | 21.6500 |
| PHG.R | Paralimbic | 21.3750 |

The frequency-specific brain networks for each participants were constructed using an AAL template. The hub regions based on regional betweenness were identified if was at least 1 SD greater than the mean of the network. The hubs were then sorted by the corresponding AUC values in each IMF. The cortical regions were classified as primary, association, and paralimbic.
